# Supplementary material for: Salvianolic Acid Y: A New Protector of PC12 Cells against Hydrogen Peroxide-Induced Injury from Salvia officinalis
Source: PubMed Central journal article supplement (PMC6272257; doi:10.3390/molecules20010683), 2015-01-06
Supplement: molecules-20-00683-s001.pdf [file molecules-20-00683-s001.pdf]

# Supplementary Materials

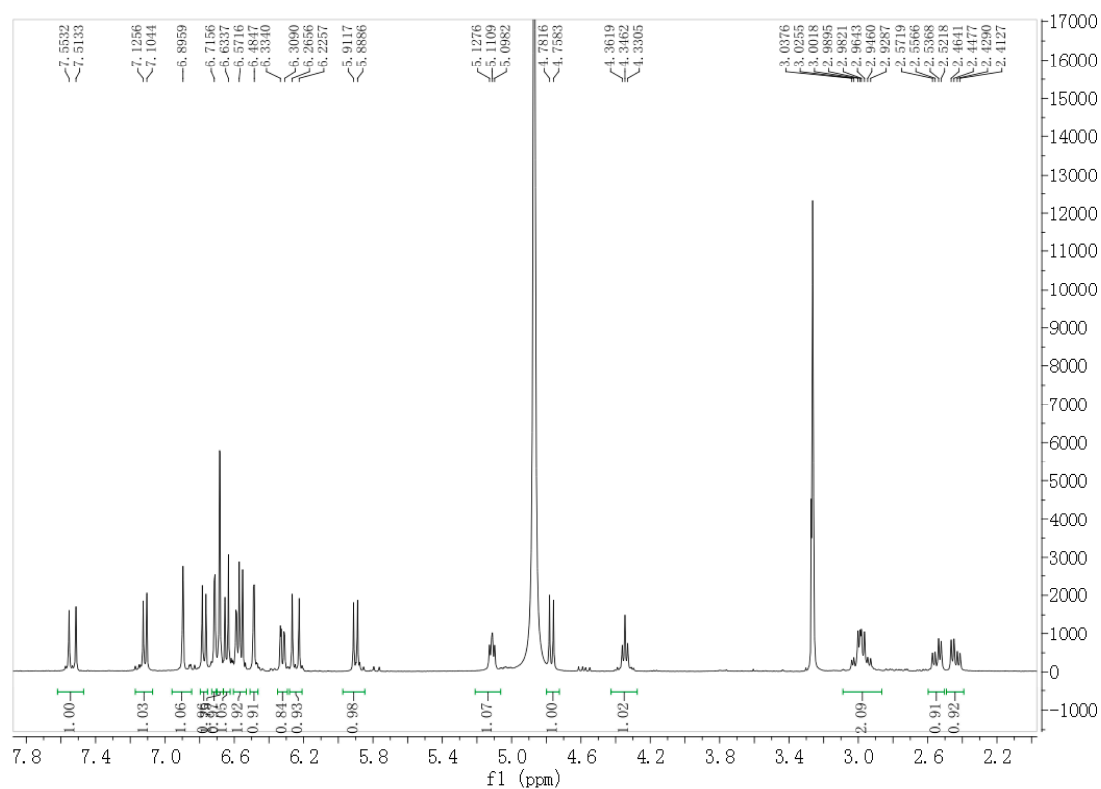

Figure S1.  $^1\text{H-NMR}$  spectrum of salvianolic acid Y (TSL 1).

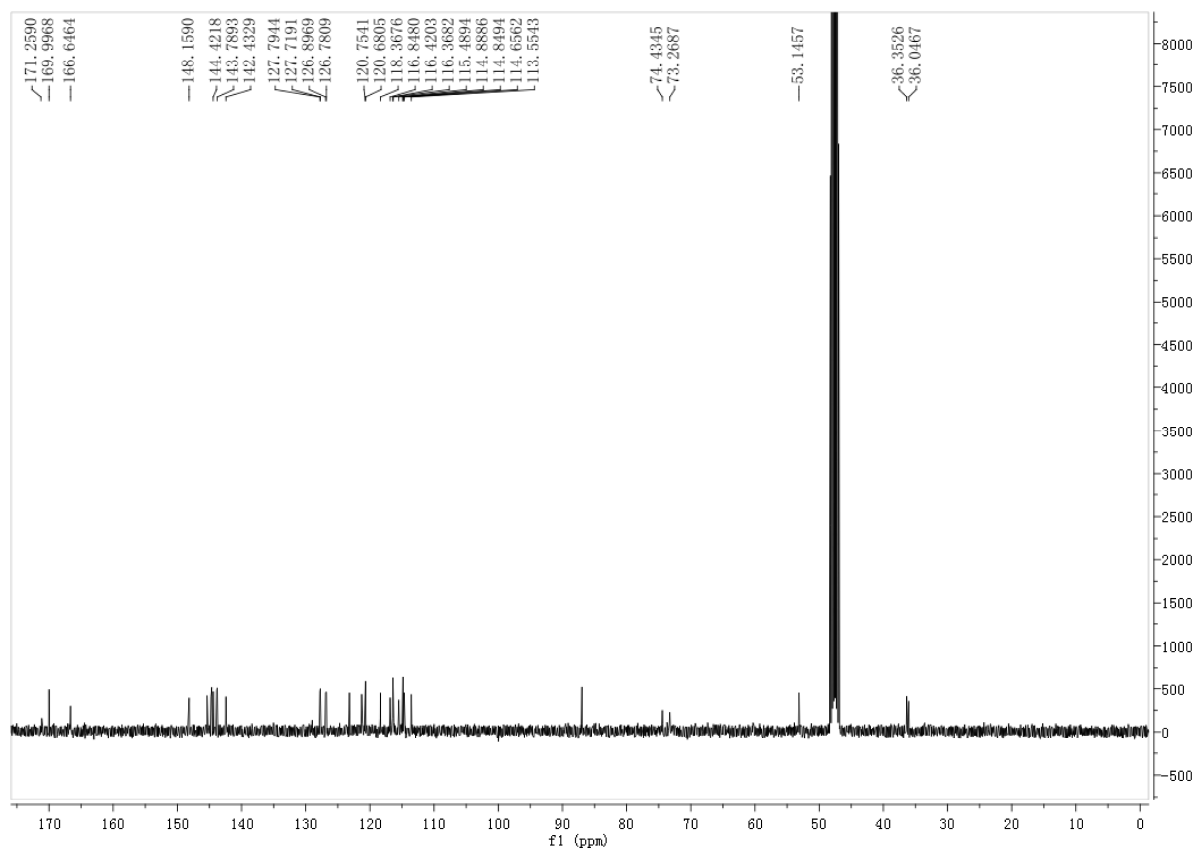

Figure S2.  $^{13}\text{C-NMR}$  spectrum of salvianolic acid Y (TSL 1).

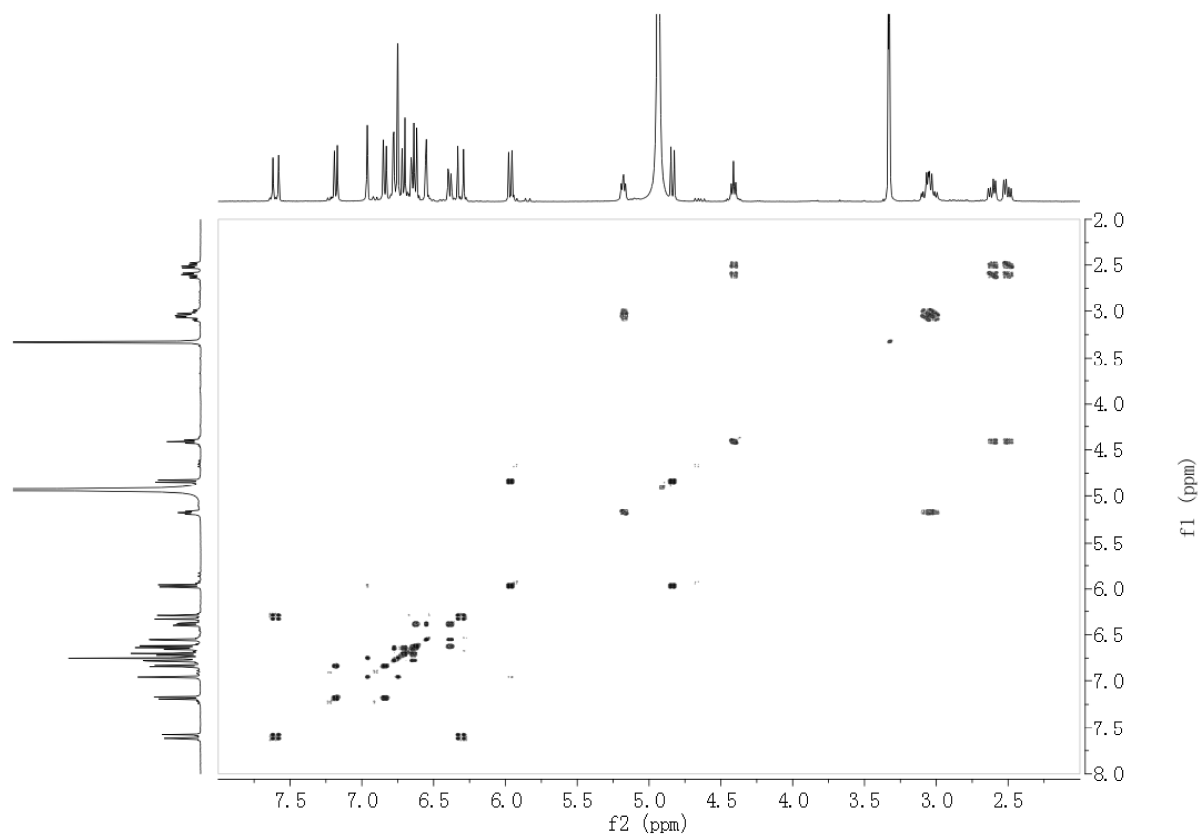

**Figure S3.**  $^1\text{H}$ - $^1\text{H}$  COSY spectrum of salvianolic acid Y (TSL 1).

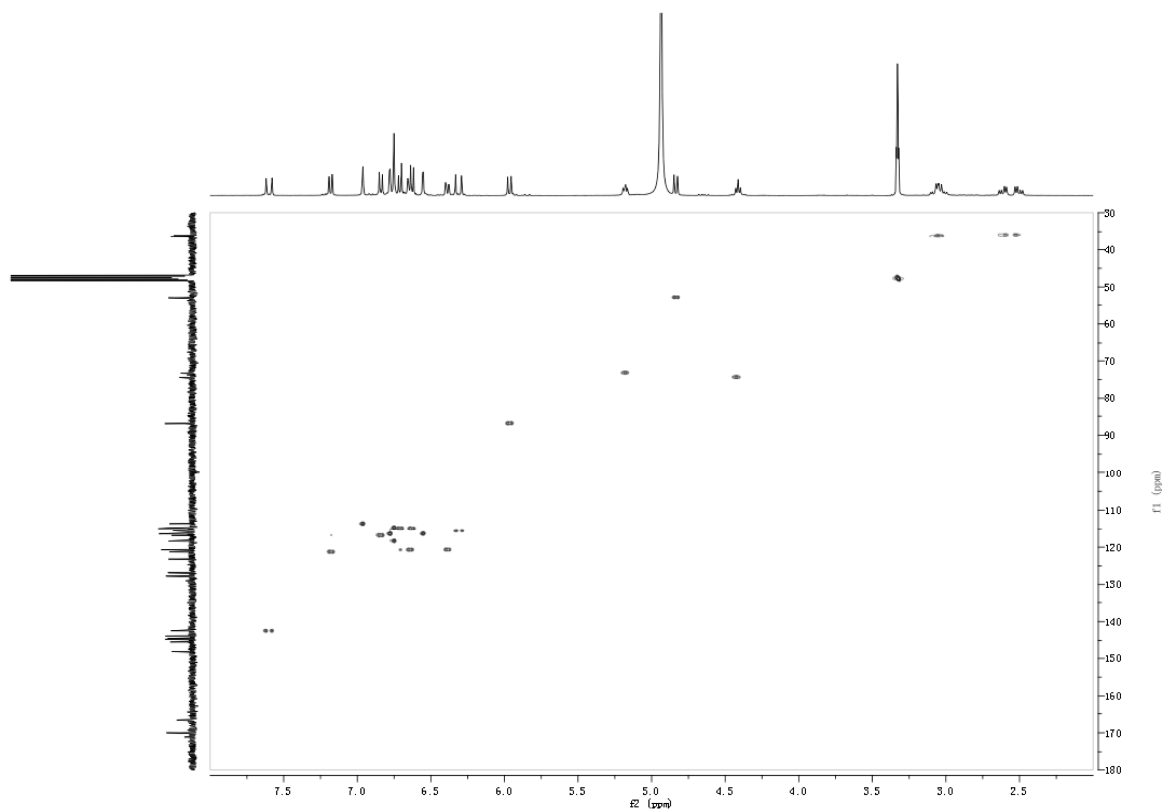

**Figure S4.** HMQC spectrum of salvianolic acid Y (TSL 1).

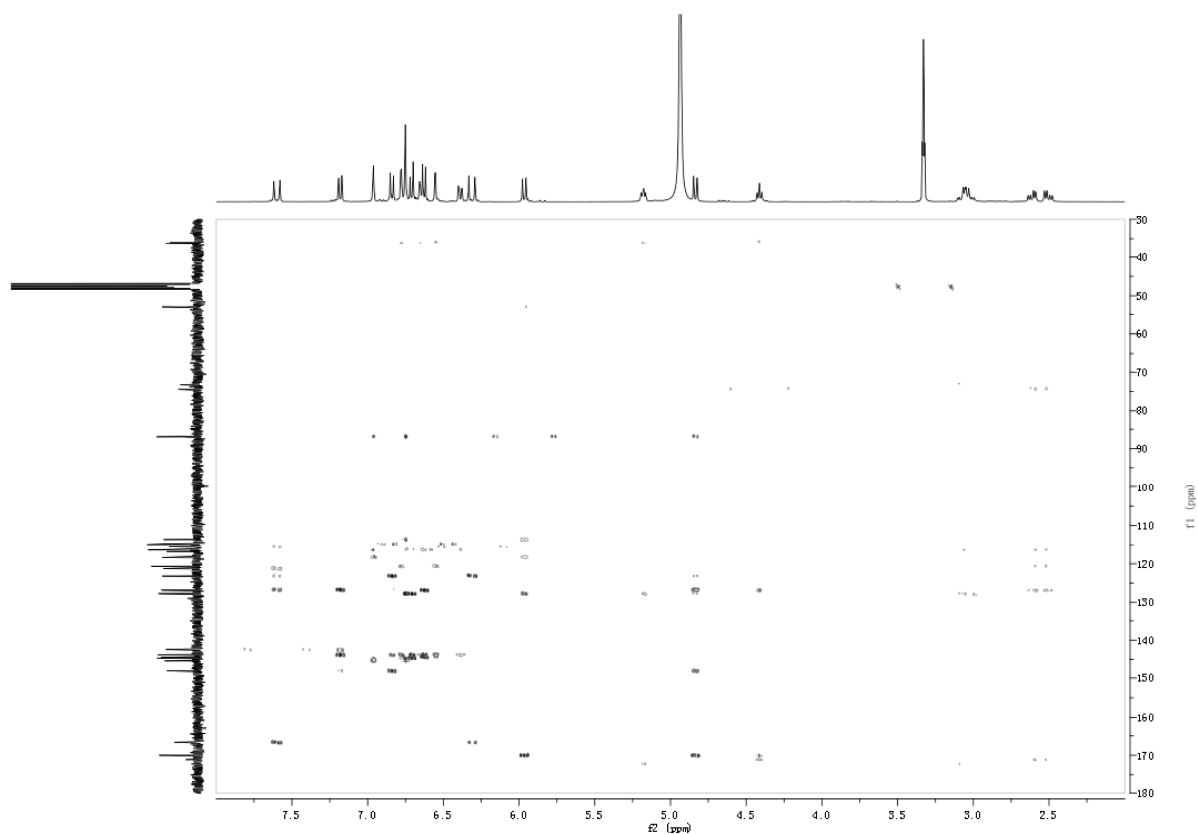

**Figure S5.** HMBC spectrum of salvianolic acid Y (TSL 1).

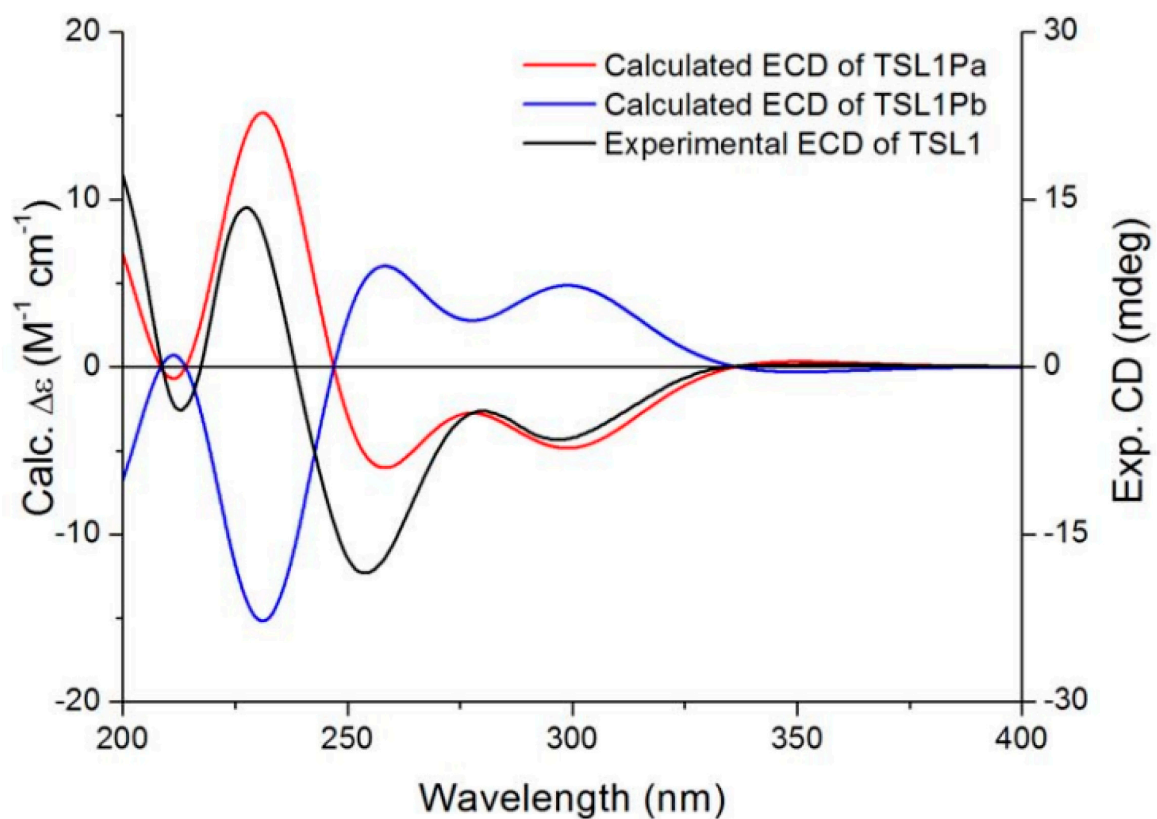

**Figure S6.** Experimental solution spectrum (black) of salvianolic acid Y (TSL 1) compared with the calculated ECD spectra of (2*R*,3*S*)-TSL 1*Pa* (red) and (2*S*,3*R*)-TSL 1*Pb* (blue).

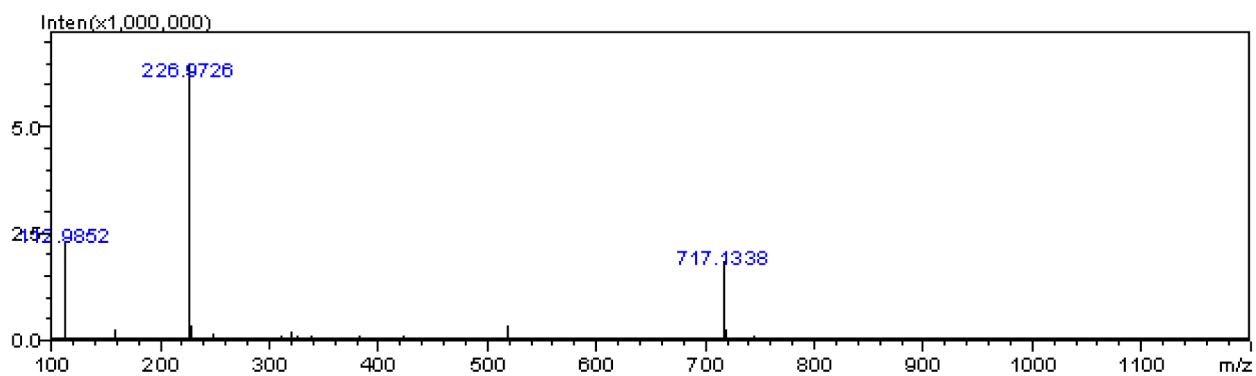

**Figure S7.** HR-ESI-MS spectrum of salvanolic acid Y (TSL 1).
